# Supplementary material for: Support vector machine versus logistic regression modeling for prediction of hospital mortality in critically ill patients with haematological malignancies
Source: Springer Nature journal article supplement (doi:10.1186/1472-6947-8-56), 2008-12-01
Supplement: 12911_2008_228_MOESM1_ESM.pdf [file 12911_2008_228_MOESM1_ESM.pdf]

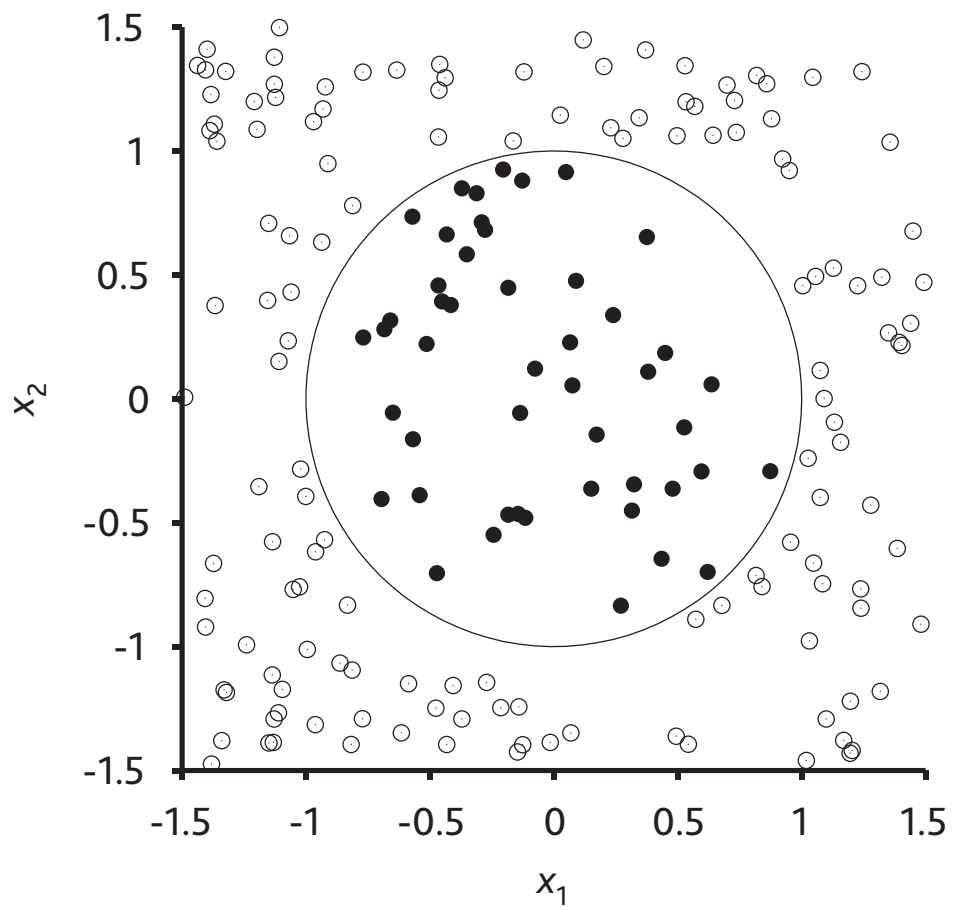

(a)

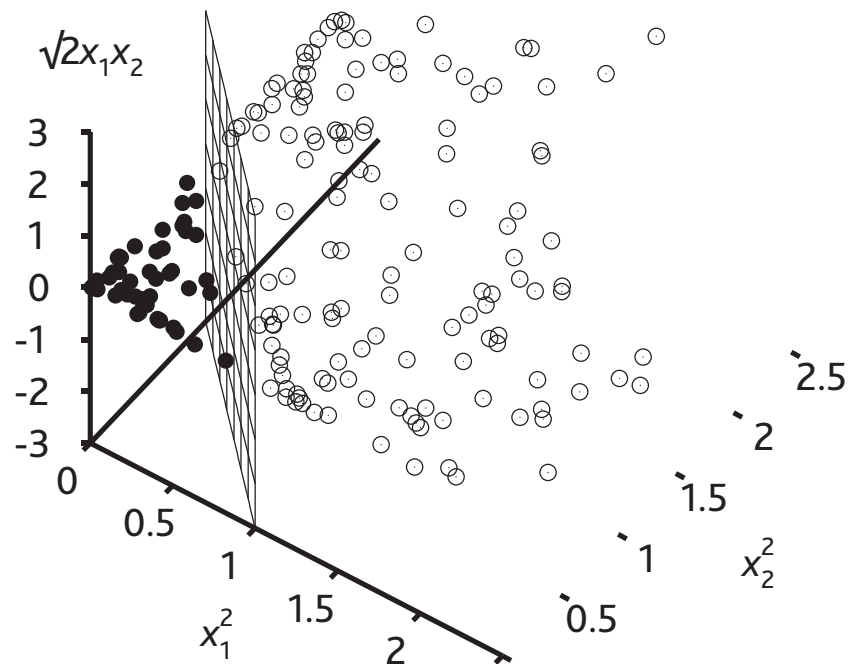

(b)
